# Supplementary material for: RANK signaling in osteoclast precursors results in a more permissive epigenetic landscape and sexually divergent patterns of gene expression
Source: PeerJ. 2023 Feb 9;11:e14814. doi: 10.7717/peerj.14814 (PMC9922499; doi:10.7717/peerj.14814)
Supplement: Supplemental Information 2 [file peerj-11-14814-s002.xlsx]

## Sheet: Sheet1
Table 1. Altered transcriptional pathways during osteoclastogenesis
Female-Specific		Male-Specific		Sex-independent
Pathway	p-value	Pathway	p-value	Pathway	p-value (Female)	p-value (Male)
Amyotrophic lateral sclerosis	9.911e-05	Cytokine-cytokine receptor interaction	1.82e-06	Non-alcoholic fatty liver disease	8.23e-05	5.476e-05
Taste Transduction	0.016	Viral protein interaction with cytokine and cytokine receptor	1.82e-06	Huntington disease	9.911e-05	0.009
		Antigen processing and presentation	1.279e-05	Thermogenesis	0.0001977	0.000363
		Staphylococcus aureus infection	1.726e-05	Retrograde endocannabinoid signaling	0.0001977	0.007
		Influenza A	2.028e-05	Cardiac muscle contraction	0.0002061	9.334e-05
		Allograft rejection	5.091e-05	Citrate cycle (TCA cycle)	0.0002061	9.334e-05
		Graft-versus-host disease	5.091e-05	Collecting duct acid secretion	0.0002061	9.334e-05
		Intestinal immune network for IgA production	5.091e-05	Metabolic pathways	0.0002061	9.334e-05
		Toll-like receptor signaling pathway	5.091e-05	Oxidative phosphorylation	0.0002061	9.334e-05
		Type I diabetes mellitus	5.091e-05	Parkinson disease	0.0002061	0.006
		Autoimmune thyroid disease	6.398e-05	Pathways of neurodegeneration - multiple diseases	0.0002061	0.046
		Inflammatory bowel disease	7.045e-05	Prion disease	0.0002679	6.78e-05
		Chemokine signaling pathway	8.795e-05	Alzheimer disease	0.0002679	0.009
		Hematopoietic cell lineage	9.334e-05	Synaptic vesicle cycle	0.0007174	0.000363
		Viral myocarditis	9.334e-05	Phagosome	0.001	9.334e-05
		Malaria	9.456e-05	Neuroactive ligand-receptor interaction	0.002	5.091e-05
		Tuberculosis	0.0001376	Rheumatoid arthritis	0.002	8.795e-05
		Asthma	0.0001522	Calcium signaling pathway	0.002	0.0003093
		Measles	0.000363	Axon guidance	0.003	0.004
		NOD-like receptor signaling pathway	0.0004404	Cell adhesion molecules	0.005	9.334e-05
		Bile secretion	0.002	Systemic lupus erythematosus	0.022	1.867e-05
		Pertussis	0.002
		Osteoclast differentiation	0.003
		Hepatitis B	0.004
		Human cytomegalovirus infection	0.005
		Legionellosis	0.007
		Pathways in cancer	0.007
		Arachidonic acid metabolism	0.009
		cAMP signaling pathway	0.009
		Toxoplasmosis	0.009
		Lysosome	0.011
		Th17 cell differentiation	0.011
		Th1 and Th2 cell differentiation	0.012
		MAPK signaling pathway	0.013
		C-type lectin receptor signaling pathway	0.014
		Pyruvate metabolism	0.018
		Necroptosis	0.02
		Human papillomavirus infection	0.021
		ABC transporters	0.024
		Epstein-Barr virus infection	0.035
		Herpes simplex virus 1 infection	0.042
		Rap1 signaling pathway	0.043
		cGMP-PKG signaling pathway	0.044
		NF-kappa B signaling pathway	0.045
		TNF signaling pathway	0.046
