# Supplementary material for: RANK signaling in osteoclast precursors results in a more permissive epigenetic landscape and sexually divergent patterns of gene expression
Source: PeerJ. 2023 Feb 9;11:e14814. doi: 10.7717/peerj.14814 (PMC9922499; doi:10.7717/peerj.14814)
Supplement: Supplemental Information 3 [file peerj-11-14814-s003.xlsx]

## Sheet: Sheet1
Table 2. Altered transcriptional pathways between sexes
Macrophage-Specific		Osteoclast-Specific		Differentiation-Independent
Pathway	p-value	Pathway	p-value	Pathway	p-value (macrophage)	p-value (osteoclast)
Fanconi anemia pathway	2.089e-05	Measles	8.397e-05	Cytokine-cytokine receptor interaction	9.461e-06	5.158e-05
Cell cycle	7.145e-05	Inflammatory bowel disease	0.0002225	Viral protein interaction with cytokine and cytokine receptor	2.089e-05	0.0001235
Asthma	0.0002193	Pertussis	0.0002225	Staphylococcus aureus infection	0.0002193	2.494e-05
DNA replication	0.0002193	Kaposi sarcoma-associated herpesvirus infection	0.0002438	Cell adhesion molecules	0.0002193	0.0002016
Homologous recombination	0.0002193	Axon guidance	0.0006318	Systemic lupus erythematosus	0.0002193	0.0002438
IL-17 signaling pathway	0.002	Human cytomegalovirus infection	0.0006318	Hematopoietic cell lineage	0.0002193	0.0002817
Progesterone-mediated oocyte maturation	0.011	Pathways in cancer	0.001	Leishmaniasis	0.0002193	0.002
Fluid shear stress and atherosclerosis	0.015	MAPK signaling pathway	0.002	Rheumatoid arthritis	0.0002407	0.0005523
Cellular senescence	0.021	ABC transporters	0.003	Malaria	0.0003039	0.0001881
Oocyte meiosis	0.022	Hepatitis B	0.003	Autoimmune thyroid disease	0.001	0.0002225
Mismatch repair	0.029	Cytosolic DNA-sensing pathway	0.004	C-type lectin receptor signaling pathway	0.001	0.01
NF-kappa B signaling pathway	0.031	Necroptosis	0.004	Tuberculosis	0.002	0.0002014
ECM-receptor interaction	0.041	Hepatitis C	0.005	Allograft rejection	0.002	0.0002225
p53 signaling pathway	0.048	Bile secretion	0.007	Antigen processing and presentation	0.004	1.312e-05
Small cell lung cancer	0.049	Hypertrophic cardiomyopathy	0.007	Type I diabetes mellitus	0.004	0.0002225
		Dilated cardiomyopathy	0.008	Graft-versus-host disease	0.004	0.0002225
		Mineral absorption	0.008	Chemokine signaling pathway	0.004	0.0008815
		cGMP-PKG signaling pathway	0.009	Intestinal immune network for IgA production	0.006	0.007
		Chagas disease	0.009	Complement and coagulation cascades	0.008	0.026
		Legionellosis	0.016	Influenza A	0.01	1.825e-05
		Herpes simplex virus 1 infection	0.017	Viral myocarditis	0.01	8.397e-05
		Human papillomavirus infection	0.017	Osteoclast differentiation	0.01	0.001
		PI3K-Akt signaling pathway	0.023	NOD-like receptor signaling pathway	0.015	0.0002225
		AGE-RAGE signaling pathway in diabetic complications	0.027	Toll-like receptor signaling pathway	0.021	0.000132
		GABAergic synapse	0.027	Transcriptional misregulation in cancer	0.021	0.012
		Oxytocin signaling pathway	0.027	TNF signaling pathway	0.021	0.025
		Arachidonic acid metabolism	0.03	Toxoplasmosis	0.022	0.014
		Salmonella infection	0.032	Neuroactive ligand-receptor interaction	0.028	0.0001881
		Human immunodeficiency virus 1 infection	0.038	Human T-cell leukemia virus 1 infection	0.028	0.002
		Rap1 signaling pathway	0.038	Epstein-Barr virus infection	0.031	0.0004312
		Circadian entrainment	0.04	Phagosome	0.041	0.0006411
		Protein digestion and absorption	0.04	Th17 cell differentiation	0.041	0.019
		Salivary secretion	0.04
		Adrenergic signaling in cardiomyocytes	0.042
