# Supplementary material for: RANK signaling in osteoclast precursors results in a more permissive epigenetic landscape and sexually divergent patterns of gene expression
Source: PeerJ. 2023 Feb 9;11:e14814. doi: 10.7717/peerj.14814 (PMC9922499; doi:10.7717/peerj.14814)
Supplement: Supplemental Information 4 [file peerj-11-14814-s004.xlsx]

## Sheet: Sheet1
Table 3. Differential chromatin accessible pathways during osteoclastogenesis
Female-Specific		Male-Specific		Sex-independent
Pathway	p-value	Pathway	p-value	Pathway	p-value (Female)	p-value (Male)
Small cell lung cancer	0.006	Protein digestion and absorption	0.008	Hippo signaling pathway	0.0007524	0.004
Endocrine resistance	0.007	cGMP-PKG signaling pathway	0.012	Axon guidance	0.0008122	0.005
Prion disease	0.009	Pancreatic secretion	0.018	Focal adhesion	0.001	0.007
alpha-Linolenic acid metabolism	0.012	Arrhythmogenic right ventricular cardiomyopathy	0.019	ECM-receptor interaction	0.002	0.004
Growth hormone synthesis, secretion and action	0.015	Ubiquinone and other terpenoid-quinone biosynthesis	0.031	Insulin secretion	0.035	0.04
Platinum drug resistance	0.018	Aldosterone synthesis and secretion	0.043
HIF-1 signaling pathway	0.025
Relaxin signaling pathway	0.025
Rap1 signaling pathway	0.029
Fluid shear stress and atherosclerosis	0.041
Glycosaminoglycan biosynthesis - heparan sulfate / heparin	0.041
Linoleic acid metabolism	0.041
Central carbon metabolism in cancer	0.042
Estrogen signaling pathway	0.042
PI3K-Akt signaling pathway	0.044
Proteoglycans in cancer	0.045
Necroptosis	0.048
