# Supplementary material for: RANK signaling in osteoclast precursors results in a more permissive epigenetic landscape and sexually divergent patterns of gene expression
Source: PeerJ. 2023 Feb 9;11:e14814. doi: 10.7717/peerj.14814 (PMC9922499; doi:10.7717/peerj.14814)
Supplement: Supplemental Information 5 [file peerj-11-14814-s005.xlsx]

## Sheet: Sheet1
Table 4. Differential chromatin accessible pathways between sexes
MCSF-specific		MCSF+RANKL Specific	Treatment-independent
Pathway	p-value	Pathway	Pathway
Influenza A	2.757e-05	NONE	NONE
Antigen processing and presentation	4.668e-05
Viral myocarditis	5.937e-05
Th17 cell differentiation	6.006e-05
Asthma	7.992e-05
Leishmaniasis	0.0001724
Staphylococcus aureus infection	0.0002965
Allograft rejection	0.0003922
Autoimmune thyroid disease	0.0003922
Graft-versus-host disease	0.0003922
Type I diabetes mellitus	0.0003922
Th1 and Th2 cell differentiation	0.000477
Inflammatory bowel disease	0.0006846
Rheumatoid arthritis	0.000702
Intestinal immune network for IgA production	0.0008248
Toxoplasmosis	0.002
Tuberculosis	0.002
Cell adhesion molecules	0.003
Hematopoietic cell lineage	0.003
Systemic lupus erythematosus	0.003
TGF-beta signaling pathway	0.004
Phagosome	0.005
Transcriptional misregulation in cancer	0.007
Human T-cell leukemia virus 1 infection	0.011
IL-17 signaling pathway	0.014
Rap1 signaling pathway	0.019
Herpes simplex virus 1 infection	0.031
Cholesterol metabolism	0.033
Epstein-Barr virus infection	0.037
ECM-receptor interaction	0.046
