# Supplementary material for: RANK signaling in osteoclast precursors results in a more permissive epigenetic landscape and sexually divergent patterns of gene expression
Source: PeerJ. 2023 Feb 9;11:e14814. doi: 10.7717/peerj.14814 (PMC9922499; doi:10.7717/peerj.14814)
Supplement: Supplemental Information 6 [file peerj-11-14814-s006.xlsx]

## Sheet: Sheet1
Table 5. Differential transcriptional and chromatin accessible pathways during osteoclastogenesis in female cells
RNA-Seq Only		ATAC-Seq Only		Common
Pathway	p-value	Pathway	p-value	Pathway	p-value (RNA-seq)	p-value (ATAC-Seq)
Non-alcoholic fatty liver disease	2.58e-07	Hippo signaling pathway	0.0007524	Prion disease	1.127e-05	0.009
Amyotrophic lateral sclerosis	9.069e-07	Focal adhesion	0.001	Axon guidance	0.0001957	0.0008122
Huntington disease	9.321e-07	Small cell lung cancer	0.006	Estrogen signaling pathway	0.013	0.042
Thermogenesis	2.787e-06	Endocrine resistance	0.007	Rap1 signaling pathway	0.026	0.029
Retrograde endocannabinoid signaling	3.098e-06	alpha-Linolenic acid metabolism	0.012	ECM-receptor interaction	0.028	0.002
Pathways of neurodegeneration - multiple diseases	6.848e-06	Growth hormone synthesis, secretion and action	0.015
Parkinson disease	6.855e-06	Platinum drug resistance	0.018
Cardiac muscle contraction	7.754e-06	HIF-1 signaling pathway	0.025
Citrate cycle (TCA cycle)	7.754e-06	Relaxin signaling pathway	0.025
Collecting duct acid secretion	7.754e-06	Insulin secretion	0.035
Metabolic pathways	7.754e-06	Fluid shear stress and atherosclerosis	0.041
Oxidative phosphorylation	7.754e-06	Glycosaminoglycan biosynthesis - heparan sulfate / heparin	0.041
Alzheimer disease	1.176e-05	Linoleic acid metabolism	0.041
Synaptic vesicle cycle	3.373e-05	Central carbon metabolism in cancer	0.042
Phagosome	6.04e-05	PI3K-Akt signaling pathway	0.044
Rheumatoid arthritis	9.485e-05	Proteoglycans in cancer	0.045
Calcium signaling pathway	0.0001388	Necroptosis	0.048
Neuroactive ligand-receptor interaction	0.0001392
Cell adhesion molecules	0.000359
Taste transduction	0.001
Systemic lupus erythematosus	0.002
Arrhythmogenic right ventricular cardiomyopathy	0.004
cAMP signaling pathway	0.004
Pyruvate metabolism	0.004
Regulation of actin cytoskeleton	0.005
Carbon metabolism	0.006
Staphylococcus aureus infection	0.006
Complement and coagulation cascades	0.008
Dilated cardiomyopathy	0.008
Viral myocarditis	0.008
Hypertrophic cardiomyopathy	0.013
Hematopoietic cell lineage	0.017
Pancreatic secretion	0.017
Transcriptional misregulation in cancer	0.017
Cytokine-cytokine receptor interaction	0.021
Pathways in cancer	0.024
Chemokine signaling pathway	0.027
ECM-receptor interaction	0.028
Arachidonic acid metabolism	0.03
Gap junction	0.031
Herpes simplex virus 1 infection	0.031
GABAergic synapse	0.033
Glycosaminoglycan degradation	0.033
Glycosphingolipid biosynthesis - lacto and neolacto series	0.033
Cellular senescence	0.037
Glutathione metabolism	0.038
p53 signaling pathway	0.038
Gastric acid secretion	0.039
Glycolysis / Gluconeogenesis	0.047
Phospholipase D signaling pathway	0.048
Progesterone-mediated oocyte maturation	0.048
Cholinergic synapse	0.05
