# Supplementary material for: RANK signaling in osteoclast precursors results in a more permissive epigenetic landscape and sexually divergent patterns of gene expression
Source: PeerJ. 2023 Feb 9;11:e14814. doi: 10.7717/peerj.14814 (PMC9922499; doi:10.7717/peerj.14814)
Supplement: Supplemental Information 7 [file peerj-11-14814-s007.xlsx]

## Sheet: Sheet1
Table 6. Differential transcriptional and chromatin accessible pathways during osteoclastogenesis in male cells
RNA-Seq Only		ATAC-Seq Only		Common
Pathway	p-value	Pathway	p-value	Pathway	p-value (RNA-Seq)	p-value (ATAC-Seq)
Cytokine-cytokine receptor interaction	1.12e-08	ECM-receptor interaction	0.004	Arrhythmogenic right ventricular cardiomyopathy	0.031	0.019
Viral protein interaction with cytokine and cytokine receptor	1.12e-08	Hippo signaling pathway	0.004	Axon guidance	0.0005408	0.005
Antigen processing and presentation	1.181e-07	Focal adhesion	0.007	cGMP-PKG signaling pathway	0.009	0.012
Staphylococcus aureus infection	2.124e-07	Protein digestion and absorption	0.008	Pancreatic secretion	0.013	0.018
Systemic lupus erythematosus	2.872e-07	Ubiquinone and other terpenoid-quinone biosynthesis	0.031
Influenza A	3.744e-07	Insulin secretion	0.04
Neuroactive ligand-receptor interaction	1.452e-06	Aldosterone synthesis and secretion	0.043
Type I diabetes mellitus	1.638e-06
Toll-like receptor signaling pathway	1.7e-06
Graft-versus-host disease	1.743e-06
Allograft rejection	1.775e-06
Intestinal immune network for IgA production	1.88e-06
Non-alcoholic fatty liver disease	2.19e-06
Autoimmune thyroid disease	2.756e-06
Prion disease	3.129e-06
Inflammatory bowel disease	3.468e-06
Chemokine signaling pathway	4.751e-06
Rheumatoid arthritis	4.871e-06
Viral myocarditis	7.22e-06
Cardiac muscle contraction	7.754e-06
Cell adhesion molecules	7.754e-06
Citrate cycle (TCA cycle)	7.754e-06
Collecting duct acid secretion	7.754e-06
Hematopoietic cell lineage	7.754e-06
Metabolic pathways	7.754e-06
Oxidative phosphorylation	7.754e-06
Phagosome	7.754e-06
Malaria	8.146e-06
Tuberculosis	1.228e-05
Asthma	1.405e-05
Calcium signaling pathway	2.951e-05
Thermogenesis	3.668e-05
Measles	3.697e-05
Synaptic vesicle cycle	3.798e-05
NOD-like receptor signaling pathway	4.743e-05
Bile secretion	0.0001812
Pertussis	0.0002517
Osteoclast differentiation	0.0002969
Hepatitis B	0.0005189
Human cytomegalovirus infection	0.0006349
Parkinson disease	0.0007147
Retrograde endocannabinoid signaling	0.0008657
Legionellosis	0.0008868
Alzheimer disease	0.001
Arachidonic acid metabolism	0.001
cAMP signaling pathway	0.001
Huntington disease	0.001
Pathways in cancer	0.001
Toxoplasmosis	0.001
C-type lectin receptor signaling pathway	0.002
Lysosome	0.002
MAPK signaling pathway	0.002
Th1 and Th2 cell differentiation	0.002
Th17 cell differentiation	0.002
Necroptosis	0.003
Pyruvate metabolism	0.003
ABC transporters	0.004
Human papillomavirus infection	0.004
Epstein-Barr virus infection	0.007
Herpes simplex virus 1 infection	0.008
Rap1 signaling pathway	0.008
NF-kappa B signaling pathway	0.009
Pathways of neurodegeneration - multiple diseases	0.009
TNF signaling pathway	0.009
Complement and coagulation cascades	0.011
Leishmaniasis	0.016
Salmonella infection	0.016
Estrogen signaling pathway	0.017
Mineral absorption	0.017
Regulation of actin cytoskeleton	0.021
Chagas disease	0.022
JAK-STAT signaling pathway	0.023
Human immunodeficiency virus 1 infection	0.026
Salivary secretion	0.026
Carbon metabolism	0.027
Dilated cardiomyopathy	0.028
Gastric acid secretion	0.029
Taste transduction	0.029
Proximal tubule bicarbonate reclamation	0.03
Glycosaminoglycan degradation	0.031
Transcriptional misregulation in cancer	0.031
Sphingolipid metabolism	0.032
Primary bile acid biosynthesis	0.04
Morphine addiction	0.043
Inflammatory mediator regulation of TRP channels	0.044
African trypanosomiasis	0.045
Ras signaling pathway	0.047
Phospholipase D signaling pathway	0.048
Proteoglycans in cancer	0.049
